# Supplementary material for: Cardiovascular disease patients have increased risk for comorbidity: A cross-sectional study in the Netherlands
Source: PubMed Central journal article supplement (PMC5795764; doi:10.1080/13814788.2017.1398318), 2017-11-23
Supplement: IGEN_A_1398318_SM0305.pdf [file IGEN_A_1398318_SM0305.pdf]

## Appendix 1: Disease groups

| Disease groups                          | Diseases                               | Codes  |
|-----------------------------------------|----------------------------------------|--------|
| All malignancies                        | Carcinomatosis                         | A79    |
|                                         | Hodgkin's disease                      | B72    |
|                                         | Leukaemia                              | B73    |
|                                         | Malignant neoplasm stomach             | D74    |
|                                         | Malignant neoplasm colon/rectum        | D75    |
|                                         | Malignant neoplasm pancreas            | D76    |
|                                         | Malignant neoplasm other/unspecified   | D77    |
|                                         | Neoplasm of eye/adnexa                 | F74    |
|                                         | Malignant neoplasm                     | N74    |
|                                         | Malignant neoplasm bronchus/lung       | R84    |
|                                         | Other malignant neoplasm               | R85    |
|                                         | Malignant neoplasm thyroid             | T71    |
|                                         | Malignant neoplasm of kidney           | U75    |
|                                         | Malignant neoplasm of bladder          | U76    |
|                                         | Other malignant neoplasm urinary tract | U77    |
|                                         | Malignant neoplasm                     | W72    |
|                                         | Malignant neoplasm cervix              | X75    |
|                                         | Malignant neoplasm breast              | X76    |
|                                         | Other malignant neoplasms              | X77    |
|                                         | Malignant neoplasm prostate            | Y77    |
| Other malignant neoplasm                | Y78                                    |        |
| Peptic ulcers                           | Duodenal ulcer                         | D85    |
|                                         | Other peptic ulcers                    | D86    |
| Other chronic gastrointestinal diseases | Diverticular disease                   | D92    |
|                                         | Chronic enteritis/ulcerative colitis   | D94    |
|                                         | Cirrhosis/other liver disease          | D97    |
| Diseases of eye                         | Retinopathy                            | F83    |
|                                         | Macular degeneration                   | F84    |
|                                         | Blindness all degrees/types            | F94    |
|                                         | Cataract                               | F92    |
|                                         | Glaucoma                               | F93    |
| Diseases of ear                         | Otosclerosis                           | H83    |
|                                         | Deafness all degrees NOS               | H86    |
|                                         | Presbycusis                            | H84    |
| Arrhythmias                             | Atrial fibrillation/flutter            | K78    |
|                                         | Paroxysmal tachycardia                 | K79    |
|                                         | Ectopic beats all types                | K80    |
|                                         | Heart valve disease non-rheumatic NOS  | K83    |
| Pulmonary circulatory diseases          | Pulmonary embolism                     | K93    |
|                                         | Phlebitis/thrombophlebitis             | K94    |
| Diseases of veins                       | Varicose veins of legs                 | K95    |
|                                         | Haemorrhoids                           | K96    |
| Osteoarthritis                          | Osteoarthritis of spine                | L84    |
|                                         | Osteoarthritis of hip                  | L89    |
|                                         | Osteoarthritis of knee                 | L90    |
|                                         | Other osteoarthritis                   | L91    |
| Osteoporosis                            | Osteoporosis                           | L95    |
| Acquired movement disorders             | Acquired deformities of spine          | L85    |
|                                         | Acquired deformities of limbs          | L98    |
| Rheumatoid arthritis                    | Rheumatoid arthritis/allied conditions | L88    |
| Migraine and headache                   | Migraine                               | N89    |
|                                         | Cluster headache                       | N90    |
| Epilepsy                                | Epilepsy all types                     | N88    |
| Mood disorders                          | Depressive disorder                    | P76    |
|                                         | Affective psychosis                    | P73    |
|                                         | Anxiety disorder/anxiety state         | P74    |
| Other mental disorders                  | Other organic psychosis                | P71    |
|                                         | Schizophrenia all types                | P72    |
|                                         | Hysterical/hypochondriacal disease     | P75    |
|                                         | Suicide attempt                        | P77    |
|                                         | Other neurotic disease                 | P79    |
|                                         | Personality disorder                   | P80    |
|                                         | Other/unspecified psychosis            | P98    |
|                                         | Chronic bronchitis/bronchiectasis      | R91    |
|                                         | Emphysema/COPD                         | R95    |
|                                         | Asthma                                 | Asthma |
| Atopic dermatitis                       | Atopic dermatitis/eczema               | S87    |
| Psoriasis                               | Psoriasis                              | S91    |
| Thyroid disorders                       | Hyperthyroidism/thyrotoxicosis         | T85    |

(continued)

## Appendix 1. Continued

| Disease groups                | Diseases                                               | Codes |
|-------------------------------|--------------------------------------------------------|-------|
|                               | Hypothyroidism/myxoedema                               | T86   |
| Diabetes mellitus             | Diabetes mellitus                                      | T90   |
| Lipid metabolism disorder     | Lipid metabolism disorder                              | T93   |
| Gout                          | Gout                                                   | T92   |
| Urinary calculus              | Urinary calculus                                       | U95   |
| Cardiovascular disease groups |                                                        |       |
| Coronary artery diseases      | Acute myocardial infarction                            | K75   |
|                               | Other/chronic ischaemic heart diseases                 | K76   |
| Heart failure                 | Heart failure                                          | K77   |
| Hypertension                  | Uncomplicated hypertension                             | K86   |
|                               | Hypertension with involvement of target organs         | K87   |
| Cerebrovascular diseases      | Transient cerebral ischaemia                           | K89   |
|                               | Stroke/cerebrovascular accident                        | K90   |
| Peripheral arterial diseases  | Atherosclerosis excluding heart/brain                  | K91   |
|                               | Other arterial obstruction/peripheral vascular disease | K92   |

## Appendix 2: Prevalence of chronic comorbidities, stratified for age group, sex and living status

| Chronic comorbid diseases               | Age groups  |             |             |             | Gender      |              |
|-----------------------------------------|-------------|-------------|-------------|-------------|-------------|--------------|
|                                         | 0–24 % (n)  | 25–44 % (n) | 45–64 % (n) | 65–84 % (n) | Male % (n)  | Female % (n) |
| All malignancies                        | 0.6 (20)    | 5.2 (177)   | 31.4 (1064) | 62.8 (2129) | 41.3 (1401) | 58.7 (1989)  |
| Peptic ulcers                           | 0.3 (3)     | 4.8 (57)    | 30.8 (364)  | 64.1 (757)  | 63.0 (744)  | 37.0 (437)   |
| Other chronic gastrointestinal diseases | 1.5 (49)    | 8.6 (277)   | 37.1 (1199) | 52.9 (1711) | 48.5 (1569) | 51.5 (1667)  |
| Diseases of the eye                     | 0.6 (34)    | 2.4 (130)   | 20.1 (1081) | 76.8 (4130) | 46.3 (2490) | 53.7 (2885)  |
| Diseases of the ear                     | 3.1 (93)    | 6.6 (197)   | 25.3 (751)  | 65.0 (1932) | 56.1 (1667) | 43.9 (1306)  |
| Arrhythmias                             | 3.1 (107)   | 6.1 (210)   | 27.4 (951)  | 63.5 (2202) | 51.8 (1798) | 48.2 (1672)  |
| Pulmonary circulatory disease           | 1.6 (20)    | 9.1 (113)   | 39.3 (488)  | 50.0 (620)  | 44.7 (555)  | 55.3 (686)   |
| Diseases of the veins                   | 1.3 (68)    | 13.1 (704)  | 42.8 (2297) | 42.8 (2301) | 33.5 (1801) | 66.5 (3569)  |
| Osteoarthritis                          | 0.2 (13)    | 2.1 (148)   | 32.6 (2316) | 65.2 (4632) | 42.5 (3022) | 57.5 (4087)  |
| Osteoporosis                            | 0.3 (8)     | 1.5 (37)    | 26.0 (639)  | 72.1 (1770) | 15.9 (391)  | 84.1 (2063)  |
| Acquired movement disorders             | 12.8 (494)  | 16.6 (642)  | 34.7 (1346) | 35.9 (1392) | 41.0 (1589) | 59.0 (2285)  |
| Rheumatoid arthritis                    | 2.7 (32)    | 9.2 (107)   | 43.2 (504)  | 44.9 (523)  | 40.0 (466)  | 60.0 (700)   |
| Migraine and headache                   | 8.6 (273)   | 27.4 (871)  | 42.0 (1333) | 22.0 (698)  | 28.6 (908)  | 71.4 (2267)  |
| Epilepsy                                | 15.5 (136)  | 22.5 (197)  | 35.0 (305)  | 26.9 (236)  | 56.6 (496)  | 43.4 (380)   |
| Mood disorders                          | 6.1 (475)   | 26.7 (2083) | 43.1 (3362) | 24.2 (1887) | 38.6 (3014) | 61.4 (4793)  |
| Other mental disorders                  | 6.2 (228)   | 31.2 (1151) | 42.3 (1562) | 20.3 (750)  | 44.2 (1630) | 55.8 (2061)  |
| COPD and bronchitis                     | 0.8 (21)    | 4.0 (105)   | 39.1 (1024) | 56.1 (1469) | 52.6 (1378) | 47.4 (1241)  |
| Asthma                                  | 23.4 (1441) | 26.0 (1599) | 32.6 (2004) | 17.9 (1102) | 49.0 (3012) | 51.0 (3134)  |
| Atopic dermatitis                       | 44.0 (1819) | 25.5 (1052) | 19.7 (815)  | 10.8 (446)  | 46.3 (1913) | 53.7 (2219)  |
| Psoriasis                               | 3.9 (85)    | 15.5 (336)  | 42.8 (928)  | 37.8 (820)  | 48.4 (1049) | 51.6 (1120)  |
| Thyroid diseases                        | 1.9 (43)    | 10.9 (249)  | 41.9 (956)  | 45.3 (1032) | 17.9 (407)  | 82.1 (1873)  |
| Diabetes mellitus                       | 1.0 (44)    | 3.6 (156)   | 33.7 (1479) | 61.7 (2704) | 56.0 (2456) | 44.0 (1927)  |
| Lipid metabolism disorder               | 0.4 (30)    | 3.9 (275)   | 41.3 (2920) | 54.4 (3844) | 50.2 (3548) | 49.8 (3521)  |
| Gout                                    | 0.8 (18)    | 3.7 (57)    | 35.3 (551)  | 60.7 (946)  | 79.5 (1239) | 20.5 (320)   |
| Urinary calculus                        | 0.9 (17)    | 11.1 (236)  | 44.0 (934)  | 44.0 (934)  | 63.1 (1338) | 36.9 (784)   |

## Appendix 3a: Likelihood of cardiovascular diseases within other cardiovascular diseases

| Diseases                           | Coronary artery diseases<br>OR (95%CI) | Hypertension<br>OR (95%CI) | Heart failure<br>OR (95%CI) | Cerebrovascular diseases<br>OR (95% CI) | Peripheral artery diseases<br>OR (95%CI) |
|------------------------------------|----------------------------------------|----------------------------|-----------------------------|-----------------------------------------|------------------------------------------|
| Peripheral artery disease          | 8.01 (7.12–9.01)                       | 5.69 (5.17–6.26)           | 10.21 (8.35–12.47)          | 8.57 (7.57–9.70)                        | –                                        |
| Cerebrovascular diseases           | 4.81 (4.27–5.43)                       | 5.99 (5.50–6.53)           | 6.63 (5.38–8.17)            | –                                       | a                                        |
| Heart failure                      | 17.42 (14.76–20.54)                    | 6.65 (5.67–7.80)           | –                           | a                                       | a                                        |
| Hypertension                       | 5.32 (4.92–5.75)                       | –                          | a                           | a                                       | a                                        |
| Coronary artery disease            | –                                      | a                          | a                           | a                                       | a                                        |
| Additional cardiovascular diseases | 7.76 (7.17–8.40)                       | 6.44 (6.10–6.81)           | 15.02 (12.38–18.23)         | 8.11 (7.42–8.86)                        | 9.25 (8.36–10.24)                        |

<sup>a</sup>Changing dependent and independent variables resulted in same odds ratios.  
OR, odds ratio; 95%CI, 95% confidence interval.

## Appendix 3b: Likelihood of chronic comorbid diseases within cardiovascular diseases

| Chronic comorbid diseases              | Coronary artery diseases<br>OR (95%CI) | Hypertension<br>OR (95%CI) | Heart failure<br>OR (95%CI) | Cerebrovascular diseases<br>OR (95%CI) | Peripheral artery diseases<br>OR (95%CI) |
|----------------------------------------|----------------------------------------|----------------------------|-----------------------------|----------------------------------------|------------------------------------------|
| <b>Diseases</b>                        |                                        |                            |                             |                                        |                                          |
| All malignancies                       | 3.05 (2.71–3.43)                       | 3.21 (2.99–3.46)           | 4.23 (3.43–5.21)            | 3.05 (2.69–3.47)                       | 2.94 (2.55–3.40)                         |
| Peptic ulcers                          | 4.00 (3.38–4.74)                       | 3.28 (2.91–3.69)           | 5.45 (4.09–7.27)            | 3.97 (3.31–4.77)                       | 4.92 (4.08–5.94)                         |
| Other chronic gastrointestinal disease | 3.11 (2.76–3.50)                       | 3.49 (3.24–3.75)           | 2.95 (2.32–3.74)            | 2.97 (2.60–3.38)                       | 2.75 (2.37–3.19)                         |
| Diseases of eye                        | 4.61 (4.21–5.04)                       | 5.40 (5.09–5.72)           | 8.30 (7.05–9.77)            | 4.75 (4.31–5.24)                       | 5.08 (4.56–5.65)                         |
| Diseases of ear                        | 3.84 (3.42–4.31)                       | 3.51 (3.25–3.79)           | 4.66 (3.77–5.75)            | 3.82 (3.37–4.33)                       | 2.97 (2.55–3.45)                         |
| Arrhythmias                            | 2.55 (2.30–2.82)                       | 4.96 (4.62–5.32)           | 23.51 (20.00–27.64)         | 5.29 (4.74–5.90)                       | 4.58 (4.04–5.18)                         |
| Pulmonary circulatory disease          | 2.58 (2.13–3.13)                       | 2.73 (2.42–3.08)           | 4.40 (3.24–5.98)            | 3.46 (2.87–4.18)                       | 3.28 (2.65–4.06)                         |
| Diseases of veins                      | 1.44 (1.27–1.63)                       | 2.19 (2.06–2.34)           | 1.70 (1.34–2.15)            | 2.03 (1.80–2.30)                       | 1.83 (1.59–2.11)                         |
| Osteoarthritis                         | 3.62 (3.32–3.95)                       | 4.87 (4.62–5.14)           | 4.65 (3.93–5.49)            | 3.54 (3.22–3.89)                       | 3.82 (3.44–4.24)                         |
| Osteoporosis                           | 1.97 (1.68–2.30)                       | 3.21 (2.94–3.49)           | 4.08 (3.22–5.18)            | 3.35 (2.91–3.86)                       | 3.03 (2.57–3.56)                         |
| Acquired movement disorders            | 1.38 (1.19–1.60)                       | 1.79 (1.66–1.93)           | 1.32 (0.97–1.78)            | 1.78 (1.54–2.05)                       | 1.87 (1.60–2.19)                         |
| Rheumatoid arthritis                   | 2.27 (1.85–2.80)                       | 2.71 (2.40–3.07)           | 4.03 (2.91–5.58)            | 2.92 (2.37–3.58)                       | 2.41 (1.88–3.08)                         |
| Migraine and headache                  | 0.94 (0.78–1.13)                       | 1.53 (1.40–1.67)           | 0.57 (0.35–0.92)            | 1.64 (1.39–1.93)                       | 1.01 (0.81–1.26)                         |
| Epilepsy                               | 1.84 (1.42–2.38)                       | 1.27 (1.07–1.50)           | 2.16 (1.33–3.52)            | 4.36 (3.55–5.34)                       | 2.21 (1.65–2.97)                         |
| Mood disorders                         | 1.50 (1.35–1.67)                       | 1.57 (1.48–1.67)           | 1.67 (1.36–2.06)            | 1.78 (1.59–1.98)                       | 1.56 (1.38–1.78)                         |
| Other mental disorders                 | 1.43 (1.23–1.65)                       | 1.22 (1.12–1.32)           | 1.59 (1.19–2.12)            | 1.57 (1.34–1.83)                       | 1.55 (1.30–1.84)                         |
| COPD and bronchitis                    | 4.60 (4.09–5.16)                       | 3.25 (3.00–3.53)           | 7.94 (6.57–9.61)            | 3.98 (3.49–4.53)                       | 6.47 (5.71–7.34)                         |
| Asthma                                 | 0.95 (0.83–1.09)                       | 1.08 (1.00–1.15)           | 1.29 (1.01–1.66)            | 1.04 (0.90–1.21)                       | 0.98 (0.83–1.16)                         |
| Atopic dermatitis                      | 0.51 (0.41–0.63)                       | 0.53 (0.48–0.59)           | 0.58 (0.38–0.89)            | 0.74 (0.60–0.90)                       | 0.47 (0.36–0.62)                         |
| Psoriasis                              | 2.29 (1.96–2.68)                       | 2.19 (1.99–2.41)           | 2.68 (2.00–3.59)            | 2.14 (1.80–2.55)                       | 2.47 (2.06–2.97)                         |
| Thyroid diseases                       | 2.30 (1.98–2.68)                       | 2.76 (2.52–3.02)           | 3.72 (2.89–4.79)            | 2.43 (2.07–2.86)                       | 2.36 (1.97–2.84)                         |
| Diabetes mellitus                      | 5.90 (5.39–6.47)                       | 7.59 (7.12–8.09)           | 8.77 (7.43–10.36)           | 4.19 (3.77–4.66)                       | 5.33 (4.77–5.96)                         |
| Lipid metabolism disorder              | 4.97 (4.57–5.40)                       | 8.08 (7.66–8.52)           | 3.47 (2.91–4.14)            | 3.74 (3.41–4.12)                       | 4.66 (4.21–5.16)                         |
| Gout                                   | 4.84 (4.20–5.57)                       | 7.24 (6.53–8.02)           | 8.30 (6.64–10.37)           | 4.04 (3.44–4.74)                       | 4.63 (3.91–5.49)                         |
| Urinary calculus                       | 3.03 (2.62–3.49)                       | 2.97 (2.71–3.25)           | 1.97 (1.41–2.76)            | 2.35 (1.98–2.79)                       | 2.34 (1.93–2.82)                         |

OR, odds ratio; 95%CI, 95% confidence interval.
